# Supplementary material for: Phosphorylation of the alternative mRNA splicing factor 45 (SPF45) by Clk1 regulates its splice site utilization, cell migration and invasion
Source: PubMed Central journal article supplement — Nucleic Acids Res. 2013 Apr 18;41(9):4949–62. doi: 10.1093/nar/gkt170 (PMC3643583; doi:10.1093/nar/gkt170), 2013-04-18
Supplement: supp_gkt170_nar-00209-a-2013-File002.pdf [file supp_gkt170_nar-00209-a-2013-File002.pdf]

SUPPLEMENTARY DATA

|                        | Forward                      | Backward                    |
|------------------------|------------------------------|-----------------------------|
| <b>Endogenous Fas</b>  | ATGTGAACATGGAATCATCAAGGAATGC | CCTTTCTGTGCTTTCTGCATGTTTTCT |
| <b>Fas minigene</b>    | AGATGTGAACATGGAATCATCAAGGA   | AGATGTGAACATGGAATCATCAAGGA  |
| <b>Myc-SPF45</b>       | CGCTTCAGGTCAATGACTGGGGCG     | GCCCGATGGAGCAGAAACTCATCTCT  |
| <b>GAPDH</b>           | AACGTGTCAGTGGTGGACCTG        | AGTGGGTGTCGCTGTTGAAGT       |
| <b>Wt-cortactin</b>    | GCAGCTGCATGAATCCAAA          | CTGCCTCTCCGACTGAACAC        |
| <b>Total-cortactin</b> | TTCCCATGGCTATGGAGGGA         | TCGACTGATATTCGTGGCCG        |
| <b>Fas (RIP-Chip)</b>  | TCAGTACGGAGTTGGGGAAG         | CAGGCCTTCCAAGTTCTGAG        |
| <b>Fibronectin 1</b>   | AGTGGGAGACCTCGAGAAGA         | ACTGTGACAGCAGGAGCATC        |

SUPPLEMENTARY TABLE 1. Primers used for RT-PCR and qRT-PCR.

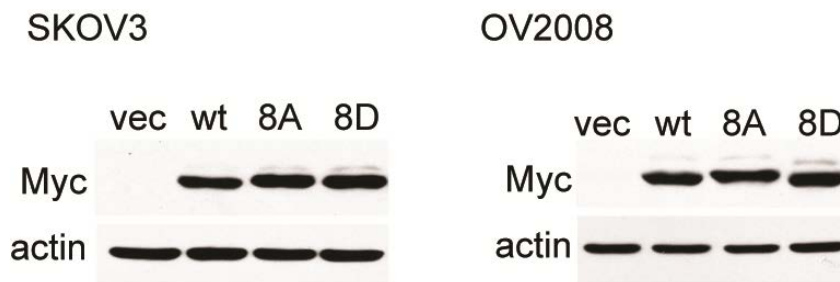

SUPPLEMENTARY FIGURE 1. Stable overexpression of SPF45 in SKOV-3 and OV2008 cell lines. (A) SKOV-3 and (B) OV2008 stable cell lines expressing Myc-SPF45, Myc-SPF45-8A Myc-SPF45-8D or empty vector were generated by retroviral transduction followed by puromycin selection. Cell lysates were immunoblotted with antibodies to Myc and actin
